# Supplementary material for: Metabolic Inflexibility Is an Early Marker of Bed-Rest–Induced Glucose Intolerance Even When Fat Mass Is Stable
Source: PubMed Central journal article supplement — J Clin Endocrinol Metab. 2018 Mar 12;103(5):1910–20. doi: 10.1210/jc.2017-02267 (PMC7263792; doi:10.1210/jc.2017-02267), 2018-03-12
Supplement: jc.2017-02267.sf1.pdf [file jc.2017-02267.sf1.pdf]

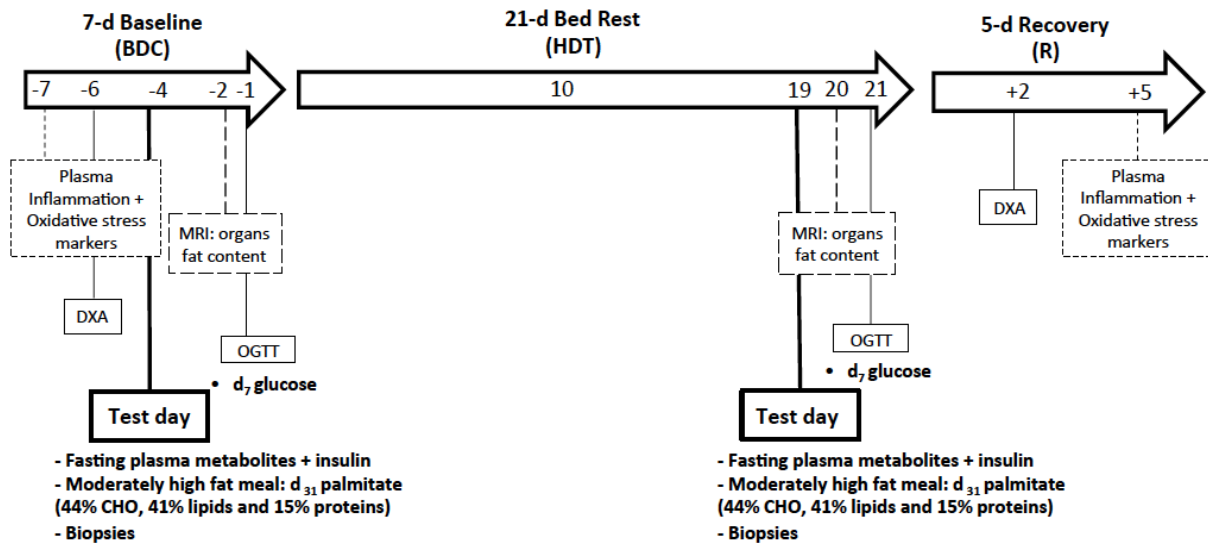

**Supplemental figure:**

Overall study design of 21 days of bed-rest (Head down tilt: HDT), preceded by 7 days of baseline (Baseline data collection: BDC) and followed by 5 days of recovery (R).

Plasma inflammation and oxidative stress markers were collected at BDC-7 and R+5. Body composition was measured at BDC-6 and R+2 using Dual-X-ray measurements (DXA). The test days were done at BDC-4 and HDT19, with the ingestion of a moderately high fat meal, biopsies were taken and fasting metabolites and insulin were measured. Muscle fat content was measured with MRI with MRI at BDC-2 and HDT20. Oral glucose tolerance test (OGTT) was done at BDC-1 and HDT21.
